# Supplementary material for: Impacts of differences in nutritional quality of wingless and winged aphids on parasitoid fitness
Source: Oxford University Press journal article supplement (doi:10.1242/jeb.185645), 2018-01-01

## Supporting information

Table S1: **Density effect on fresh weight, dry weight and lipid content in the no-choice experiment.**

| Parameters    | Factors of the analysis | p-value |
|---------------|-------------------------|---------|
| Fresh weight  | Sex                     | <0.0001 |
|               | Morph                   | <0.0001 |
|               | Density                 | ns      |
|               | Morph:Density           | 0.00041 |
| Dry weight    | Sex                     | <0.0001 |
|               | Morph                   | <0.0001 |
|               | Density                 | ns      |
|               | Morph:Density           | 0.00017 |
| Lipid content | Sex                     | <0.0001 |
|               | Morph                   | <0.0001 |
|               | Density                 | ns      |
|               | Morph:Density           | 0.00016 |

For females, n=34 in winged morph in high density and n=14 in low density, n=47 in wingless morph in high density and n=8 in low density. For males, n=44, n=12, n=39, n=14 respectively. GLM, ns indicates no significant difference and a p-value above 0.05.

Figure S1: **Linear regressions of energetic compartments (glycogen, sugars, lipids and proteins) ( $\mu\text{g}$ ) along with aphid fresh weight (mg) for wingless (green) and winged (red) aphids.** Each data point corresponds to one biological replicate (15 aphids),  $n=42$  for wingless aphids and  $n=41$  for winged aphids. All energetic compartments correlated with fresh weight for the wingless and the winged morph ( $P<0.0001$ ).

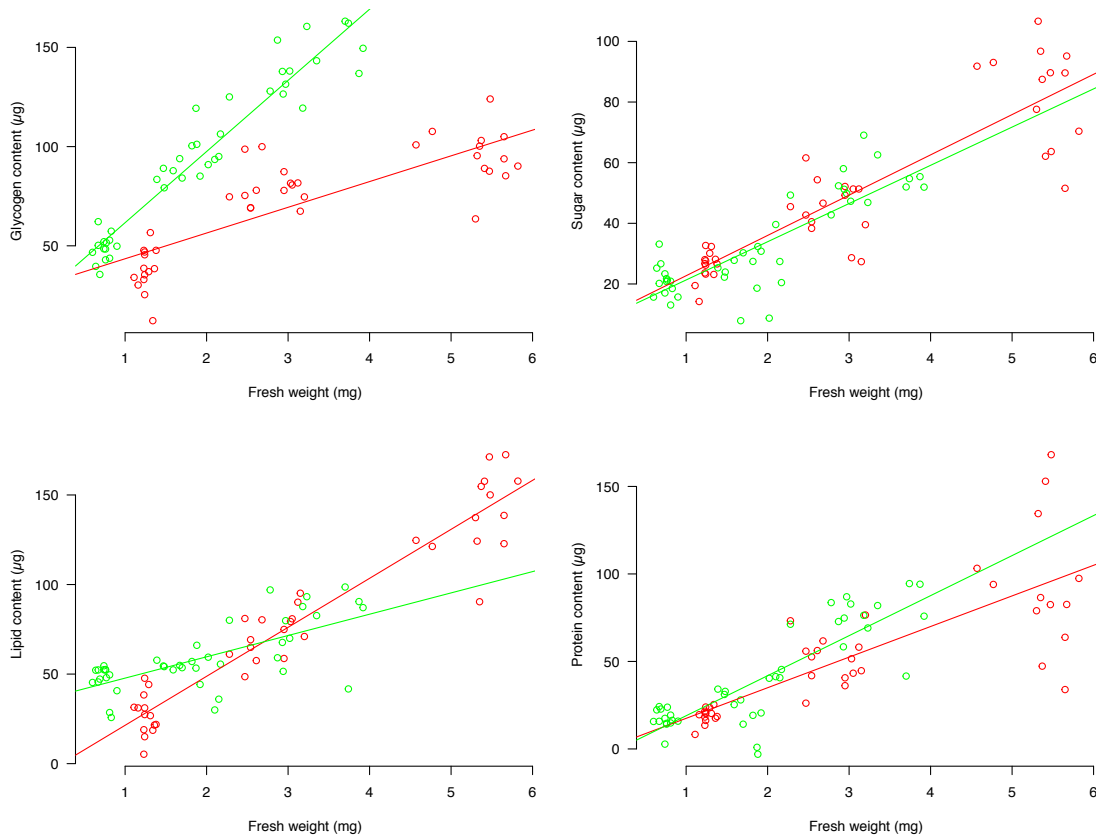

**Table S2: Number of parasitoids used in this study and their distribution among the experimental modalities according to the stage and morph (WD: winged, WL: wingless).**

| Experiment | Parameter     | Aphid morph | Aphid stage | Female | Male |
|------------|---------------|-------------|-------------|--------|------|
| No choice  | Fresh weight  | WD          | Third       | 48     | 56   |
|            | Dry weight    |             | Fourth      | 34     | 33   |
|            | Lipid content | WL          | Third       | 55     | 53   |
|            |               |             | Fourth      | 14     | 16   |
| Choice     | Fresh weight  | WD          | Third       | 23     | -    |
|            | Tibia size    |             | Fourth      | 29     | -    |
|            | Wing area     | WL          | Third       | 25     | -    |
|            | Wing load     |             | Fourth      | 15     | -    |
|            | Egg load      | WD          | Third       | 20     | -    |
|            | Egg volume    | WL          |             | 19     | -    |

Fig. S2: **Boxplot of residuals for wing area (mm<sup>2</sup>) (regression with mummy size) for female parasitoids emerging from two different aphid stages (3: third, 4: fourth) and aphid morph (WD: winged, WL: wingless).** n=23 in 3WD, n=25 in 3WL, n=29 in 4WD and n=15 in 4WL. GLM with post-hoc test (Tukey adjustment).

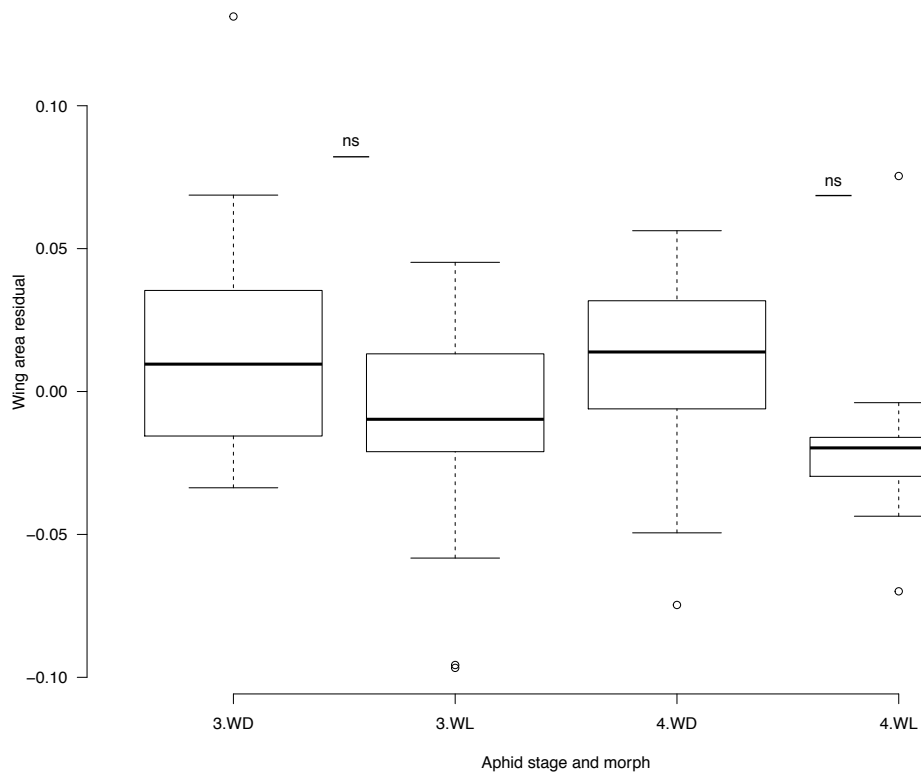

Fig. S3: **Boxplot of egg volume ( $\mu\text{m}^3$ ) for female parasitoids emerging from the third aphid stage and from two different aphid morphs (WD: winged, WL: wingless). n=20 in 3WD, n=19 in 3WL. GLM.**

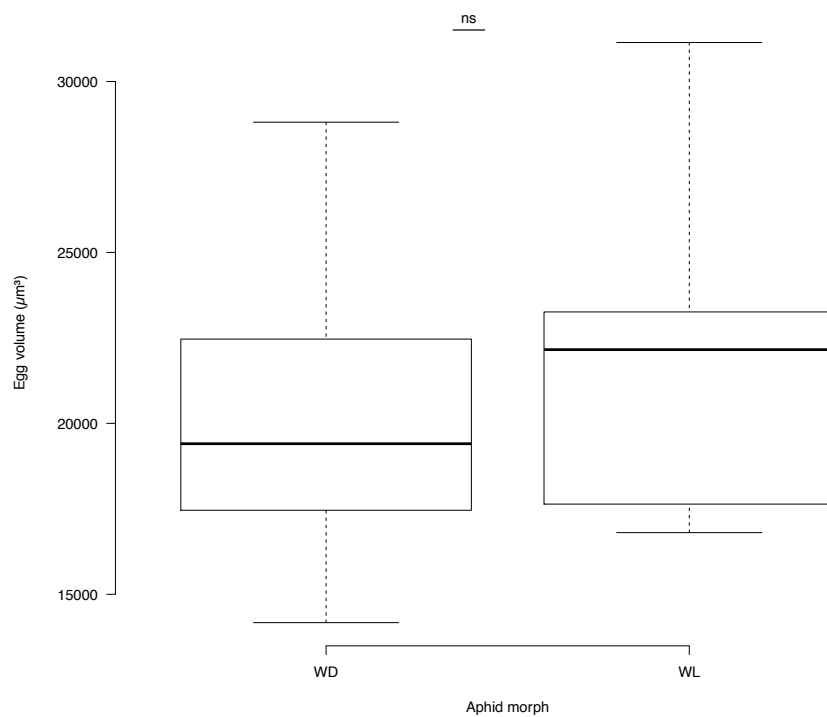

Fig. S4: **Boxplot of reproductive effort for female parasitoids emerging from the third aphid stage and from two different aphid morphs (WD: winged, WL: wingless). n=20 in 3WD, n=19 in 3WL. GLM.**

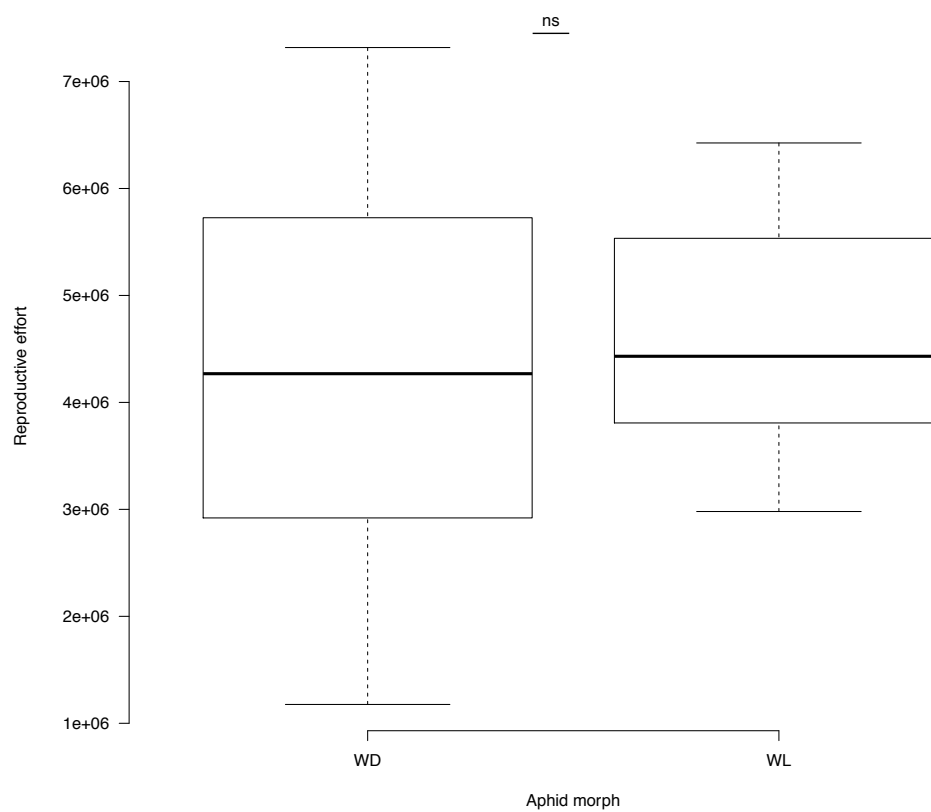

Supplement: jeb185645supp.pdf [file jeb185645supp.pdf]
